# Supplementary material for: One-step preparation of an anti-freezing and flame-retardant eutectic gel electrolyte for assembling a flexible and high-performance zinc-ion battery
Source: Royal Society of Chemistry journal article supplement (doi:10.1039/d4ta07535h), 2025-01-01
Supplement: d4ta07535h1.pdf [file d4ta07535h1.pdf]

## Supplementary Information

### **One-step preparation of anti-freezing and flame- retardant eutectic gel electrolyte for assembling flexible and high-performance zinc-ion battery**

Qihe Peng,<sup>a</sup> Runbin Cao,<sup>a</sup> Hui Ma,<sup>b</sup> Yunjin Li,<sup>a</sup> Enhong Zhu,<sup>a</sup> Xu Zhu,<sup>a</sup> Ning Ma,<sup>a</sup> Mianqi Xue,<sup>\*b</sup>  
Xinyue Zhang<sup>\*a</sup>

<sup>a</sup>Qingdao Innovation and Development Center, Harbin Engineering University, Qingdao 266000,  
China.

<sup>b</sup>Technical Institute of Physics and Chemistry, Chinese Academy of Science, Beijing 100190, China

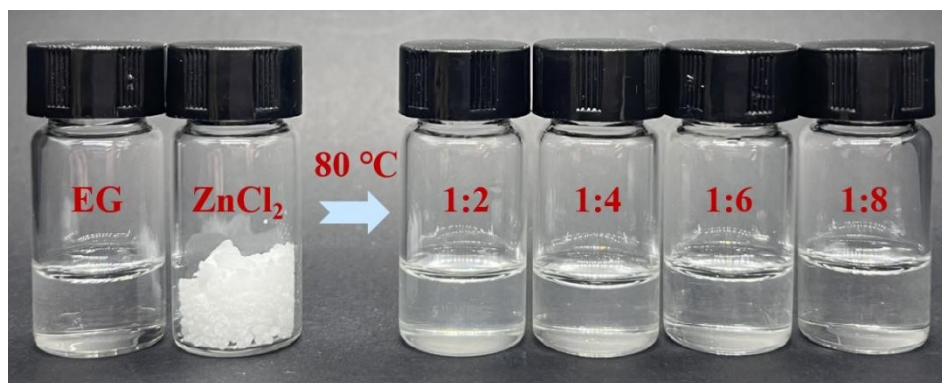

**Figure S1.** The pictures of DES under various ratios of ZDES (ZE2, ZE4, ZE6, ZE8).

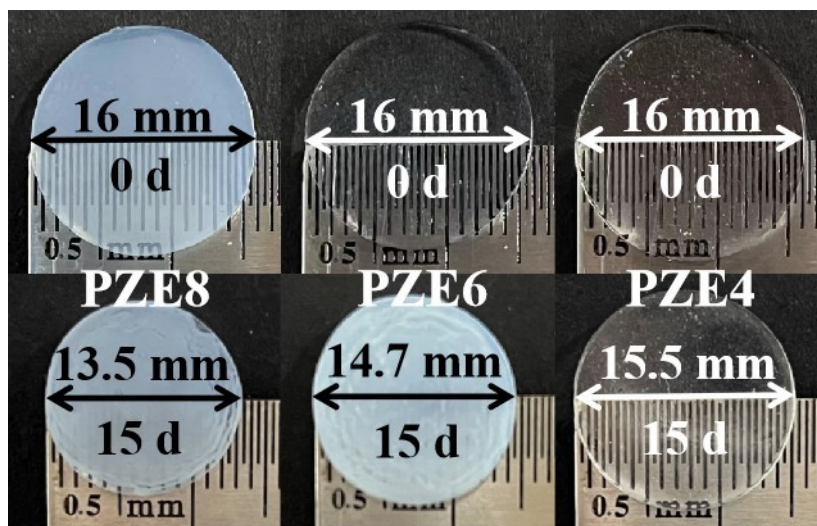

**Figure S2.** The pictures of volume changes for PVA-ZDES (PZE4, PZE6, PZE8) before and after a 15-day period.

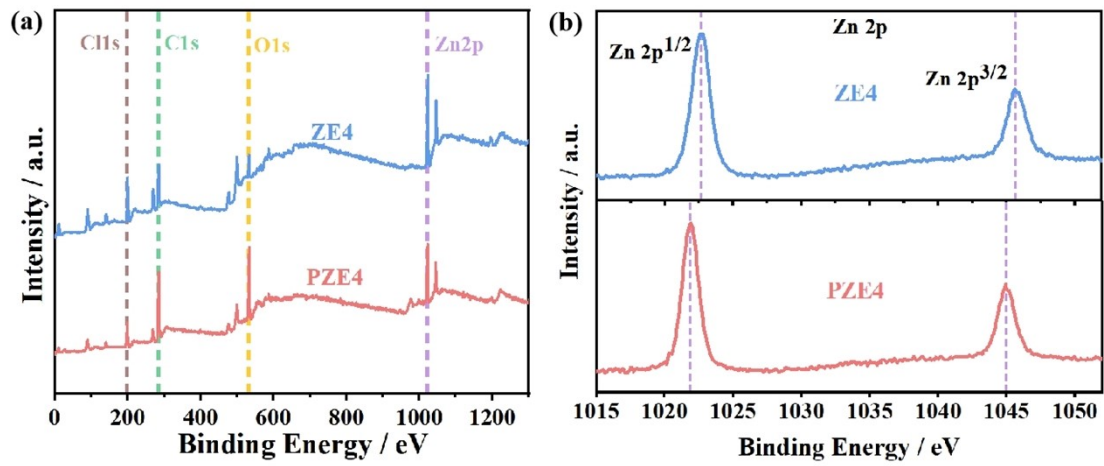

**Figure S3.** (a) The survey XPS spectra of ZE4 and PZE4-W, (b) The high resolution Zn 2p spectra of ZE4 and PZE4-W.

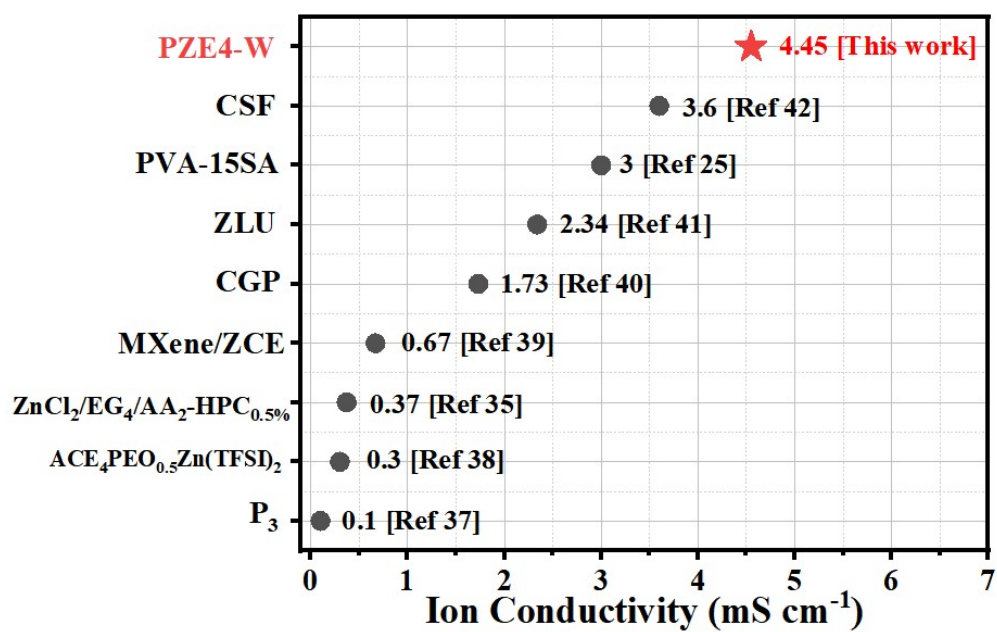

**Figure S4.** The ionic conductivity of PZE4-W was compared with that of zinc-based eutectic gel reported in recent years.<sup>25, 35, 37-42</sup>

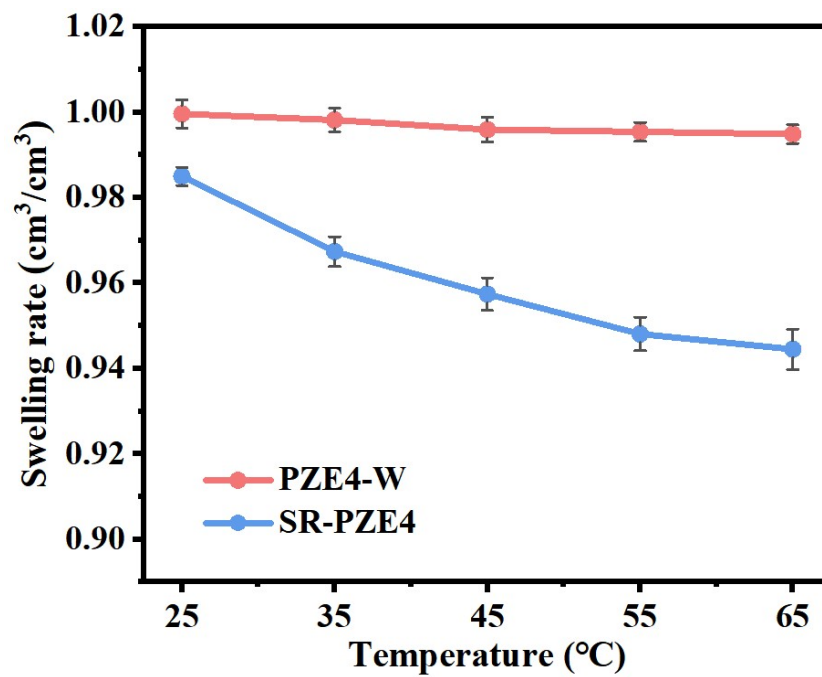

**Figure S5.** The swelling rate of PZE4-W and SR-PZE4 gel at different temperatures.

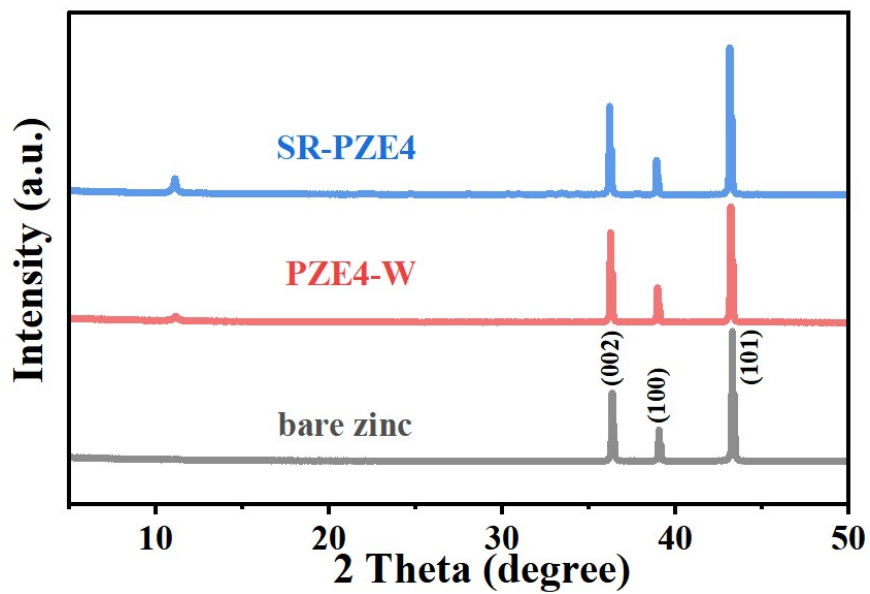

**Figure S6.** XRD analysis of bare zinc and the zinc surface with SR-PZE4 and PZE4-W electrolytes following 10 deposition-stripping cycles of Zn||Zn symmetric cells, respectively.

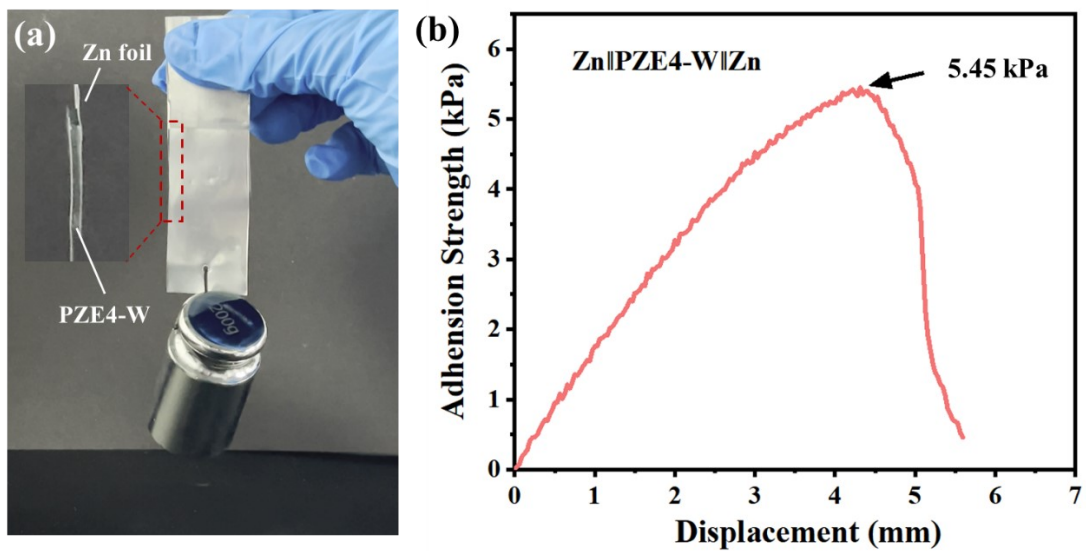

**Figure S7.** (a) Optical photos of the adhesion behavior of PZE4-W cocystal gel to zinc electrode. (b) Tensile shear curves of PZE4-W eutecticgels with Zn foil



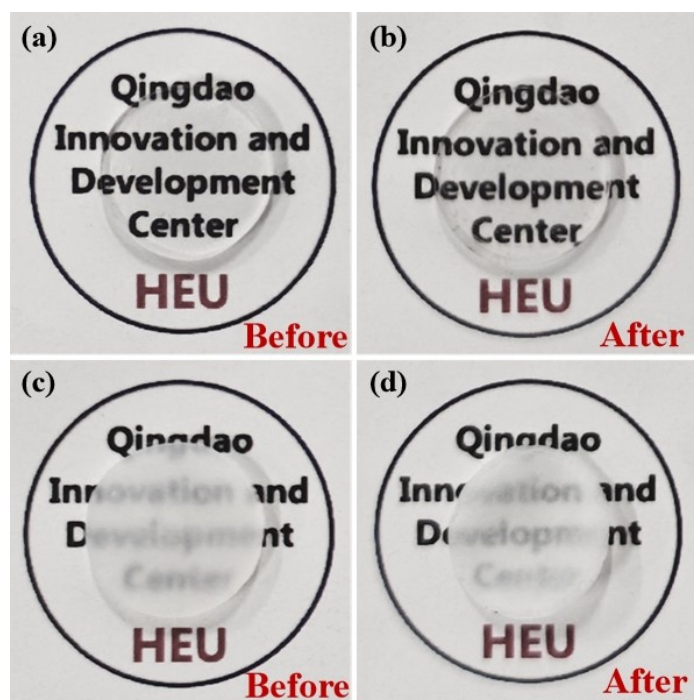

**Figure S8.** Optical images of (a, b) PZE4-W electrolyte and (c, d) SR-PZE4 electrolyte before and after 50 cycles of deposition and stripping at a current density of  $1 \text{ mA cm}^{-2}$ .

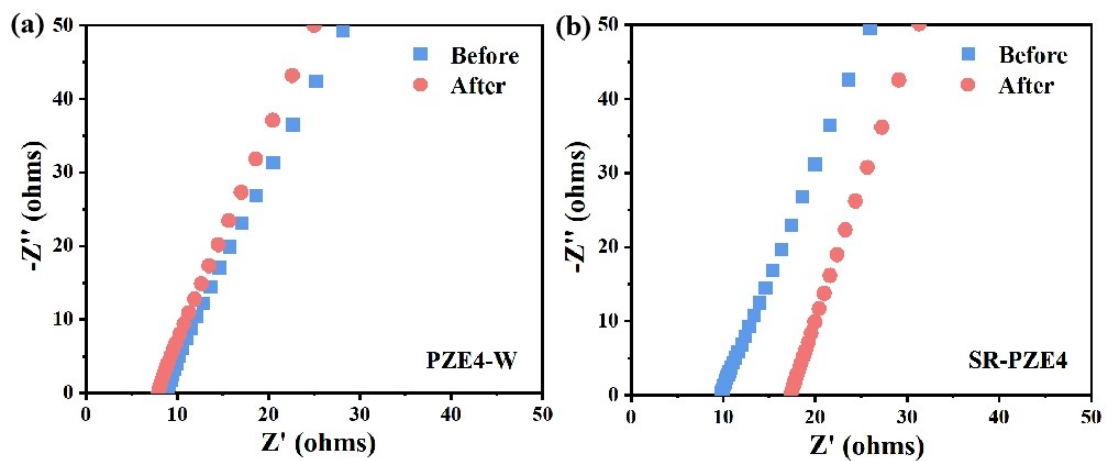

**Figure S9.** The EIS of (a, b) PZE4-W electrolyte and (c, d) SR-PZE4 electrolyte before and after 50 cycles of deposition and stripping at a current density of  $1 \text{ mA cm}^{-2}$ .

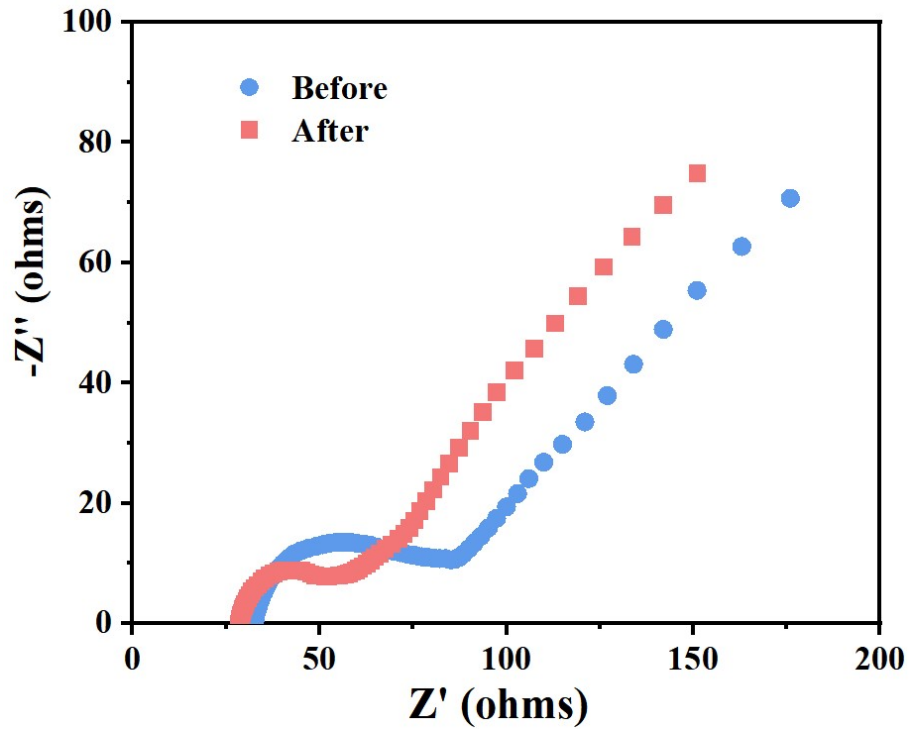

Figure S10. EIS of Zn||PZE4-W||PANI-CC button cell before and after rate cycling.

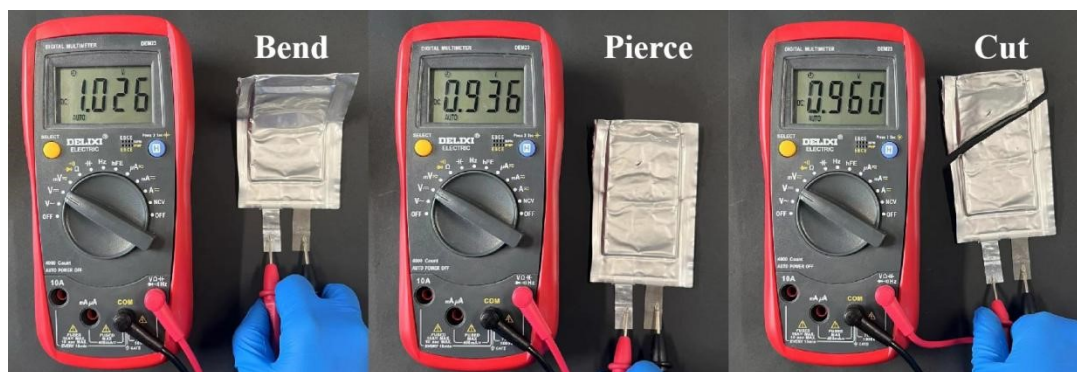

**Figure S11.** Pictures of voltage changes in Zn||PANI solid-state soft-pack batteries under bending, piercing, and cutting.

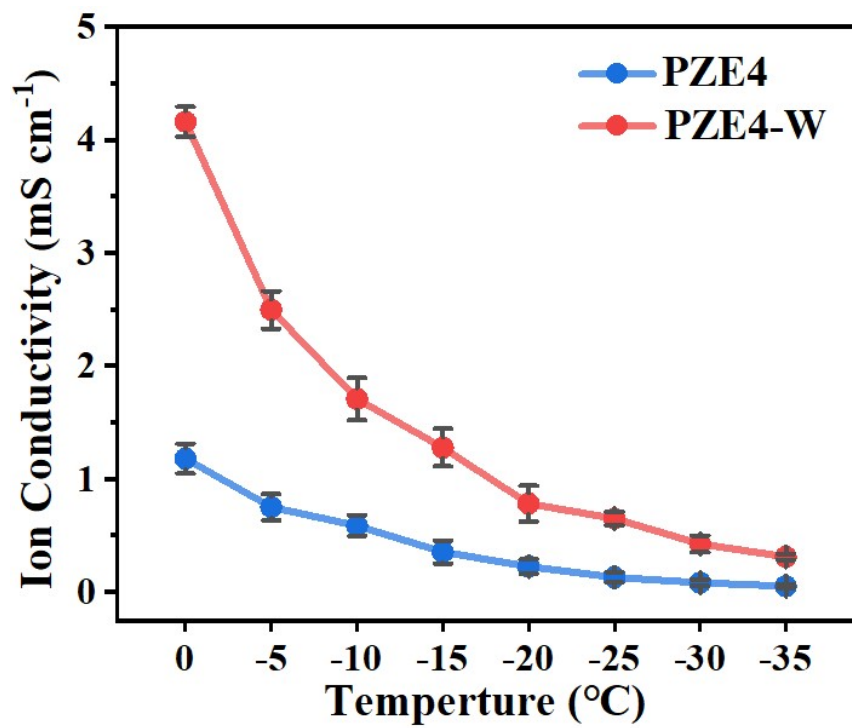

**Figure S12.** The ionic conductivity of the PZE4 and PZE4-W electrolytes from -35°C to 0°C.
